# Supplementary material
Source: HighWire-hosted journal article supplement (https://erj.ersjournals.com/content/54/4/1901272)
Supplement: inline-supplementary-material-1 [file inline-supplementary-material-1.pdf]

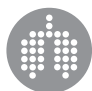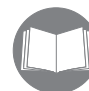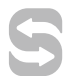

SHAREABLE PDF

# The future of drug-resistant tuberculosis treatment: learning from the past and the 2019 World Health Organization consolidated guidelines

José A. Caminero<sup>1,2</sup>, Alberto L. García-Basteiro<sup>3,4</sup>, Adrián Rendon<sup>5</sup>,  
Alberto Piubello<sup>2,6</sup>, Emanuele Pontali<sup>7</sup> and Giovanni Battista Migliori <sup>8</sup>

**Affiliations:** <sup>1</sup>Pneumology Dept, General Hospital of Gran Canaria “Dr. Negrin”, Las Palmas de Gran Canaria, Spain. <sup>2</sup>International Union against Tuberculosis and Lung Disease, Paris, France. <sup>3</sup>ISGlobal, Hospital Clínic – Universitat de Barcelona, Barcelona, Spain. <sup>4</sup>Centro de Investigação em Saúde de Manhiça (CISM), Maputo, Mozambique. <sup>5</sup>Centro de Investigación, Prevención y Tratamiento de Infecciones Respiratorias – CIPTIR, Hospital Universitario de Monterrey, Universidad Autónoma de Nuevo León –UANL, Monterrey, México. <sup>6</sup>Tuberculosis Division, Damien Foundation, Niamey, Niger. <sup>7</sup>Dept of Infectious Diseases, Galliera Hospital, Genova, Italy. <sup>8</sup>Servizio di Epidemiologia Clinica delle Malattie Respiratorie, Istituti Clinici Scientifici Maugeri IRCCS, Tradate, Italy.

**Correspondence:** José A. Caminero, Pneumology Dept, Hospital General de Gran Canaria “Dr. Negrin”, Barranco de la Ballena s/n, 35010 Las Palmas de Gran Canaria, Spain. E-mail: [jcamlun@gobiernodecanarias.org](mailto:jcamlun@gobiernodecanarias.org)

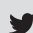

@ERSpublications

New shorter MDR-TB regimens based on drugs administered orally <http://bit.ly/2Nwg6lv>

**Cite this article as:** Caminero JA, García-Basteiro AL, Rendon A, *et al.* The future of drug-resistant tuberculosis treatment: learning from the past and the 2019 World Health Organization consolidated guidelines. *Eur Respir J* 2019; 54: 1901272 [<https://doi.org/10.1183/13993003.01272-2019>].

This single-page version can be shared freely online.

The World Health Organization (WHO) recently launched the consolidated guidelines on drug-resistant tuberculosis (DR-TB) treatment [1]. They include a new drug classification to manage rifampicin-resistant (RR) and multidrug-resistant (MDR)-TB, while proposing either a shorter regimen (including injectable drugs) or a longer all-oral one as the recommended treatment options. Efficient diagnostic tools are presently available to diagnose resistance to second-line drugs within a few hours (instead of the weeks previously needed) [2]. Therefore, the challenge for National TB Programmes is now to capture these new recommendations in their national guidelines. The aim of this article is to contribute to the ongoing discussion on RR-/MDR-TB treatment considering the lessons learnt over the past 70 years of anti-TB chemotherapy. Other important topics raised in the 2019 WHO drug-resistant treatment guidelines, such as the treatment of isoniazid-resistant TB or the comparison between the two WHO-approved regimens for MDR-TB, have not been addressed within the constraints of this short editorial.
